# Supplementary material
Source: Springer Nature journal article supplement (https://www.springermedizin.de/resource/supplementary/12958_2011_855_MOESM4_ESM.pdf/9569028)

## Flow cytometric analysis

(A) Before separation

(B) After separation

between PMNs and PBMCs

between PMNs and PBMCs

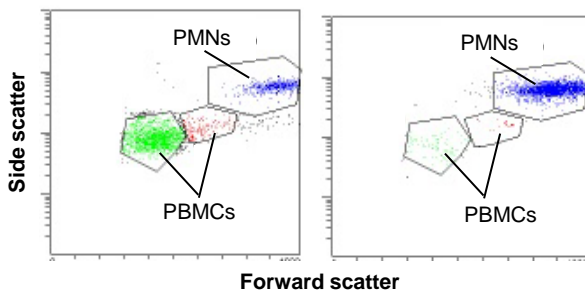

(C) PMN migration by the CL supernatant

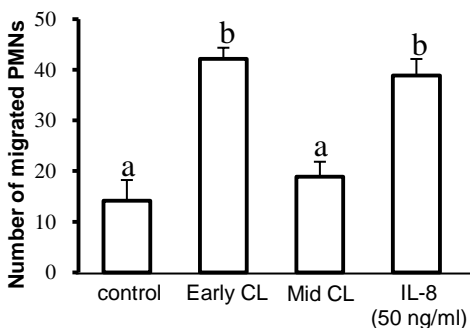

(D) Reduction rate of migrated PMNs

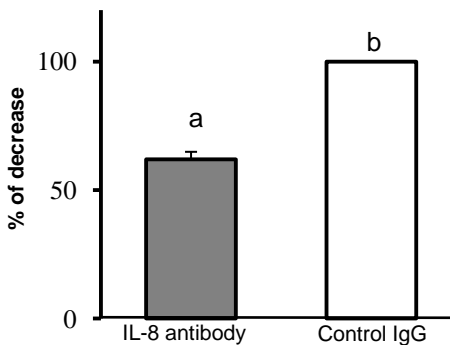

Supplement: MOESM4 [file 9569028]
